# Supplementary material for: Evaluation of Prognostic Factors Affecting Quality of Life in Patients Three Months After Surgery for Head Cancer - A Qualitative Study
Source: Research Square preprint supplement (doi:10.21203/rs.3.rs-8225118/v1), 2025-12-30
Supplement: Supplementary file 2 [file c2f77e50b8d885bd3ac2599a.xlsx]

## Sheet: Podsumowanie eksportu
	Nazwa arkusza Numbers	Nazwa tabeli Numbers	Nazwa arkusza aplikacji Excel
	Ank 1 WHOQOL-BREF
		Tabela 1	Ank 1 WHOQOL-BREF
	WHOQOL-BREF
		Tabela 1	WHOQOL-BREF
	nformation from the computer i
		Tabela 1	nformation from the computer i
	MSPSS
		Tabela 1	MSPSS
	AIS
		Tabela 1	AIS
	I-ADL
		Tabela 1	I-ADL

## Sheet: WHOQOL-BREF
question number																											D1			D2			D3			D4
1	2	3	4	5	6	7	8	9	10	11	12	13	14	15	16	17	18	19	20	21	22	23	24	25	26	cancer stage	a	b	c	a	b	c	a	b	c	a	b	c
5	4	5	5	4	4	5	5	4	5	5	5	5	5	5	5	4	5	5	5	5	5	5	5	5	5	1	26	18.6667	91.6667	24	16.3077	50	15	20	100	44	19.36	112.5
5	5	4	5	5	4	5	5	5	5	4	4	5	4	5	4	5	5	5	5	4	5	5	5	5	4	1	27	20	100	25	17.5385	53.8462	14	18.5455	91.6667	43	18.72	109.375
4	5	5	5	5	5	4	4	5	5	4	5	5	5	5	5	5	5	5	4	4	5	4	5	5	5	1	27	20	100	24	16.3077	50	13	17.0909	83.3333	43	18.72	109.375
4	4	4	4	4	4	4	4	4	4	4	4	4	4	4	5	4	4	4	4	3	4	4	4	4	4	2	25	17.3333	83.3333	22	13.8462	42.3077	11	14.1818	66.6667	36	14.24	87.5
4	4	4	4	5	4	4	4	4	5	4	4	4	4	4	3	4	4	4	4	4	4	4	4	4	4	2	24	16	75	23	15.0769	46.1538	12	15.6364	75	36	14.24	87.5
5	5	5	5	4	5	5	5	5	5	5	5	5	5	5	5	4	5	5	5	5	5	5	4	5	5	1	26	18.6667	91.6667	25	17.5385	53.8462	15	20	100	44	19.36	112.5
4	4	4	4	4	4	4	4	3	4	4	4	4	3	4	4	4	3	4	4	3	4	4	4	4	4	2	23	14.6667	66.6667	22	13.8462	42.3077	11	14.1818	66.6667	34	12.96	81.25
5	5	5	5	4	5	5	5	5	5	5	5	5	5	5	5	5	5	5	4	5	5	5	5	5	5	1	27	20	100	25	17.5385	53.8462	14	18.5455	91.6667	45	20	115.625
4	4	4	4	4	4	4	4	4	4	3	4	4	4	4	3	4	4	4	4	4	4	4	4	4	4	2	23	14.6667	66.6667	21	12.6154	38.4615	12	15.6364	75	36	14.24	87.5
5	5	5	5	5	5	5	5	5	5	5	5	5	5	4	5	5	5	5	5	5	4	5	5	5	5	1	26	18.6667	91.6667	26	18.7692	57.6923	14	18.5455	91.6667	45	20	115.625
4	4	4	4	4	4	4	4	4	3	3	4	3	4	4	4	5	3	4	4	5	4	4	4	4	4	2	23	14.6667	66.6667	21	12.6154	38.4615	13	17.0909	83.3333	34	12.96	81.25
5	5	5	5	5	5	5	5	5	5	5	5	5	5	5	5	5	5	5	5	5	5	5	5	4	5	1	27	20	100	26	18.7692	57.6923	15	20	100	44	19.36	112.5
4	4	4	4	3	4	4	4	4	4	3	4	3	4	4	4	4	4	4	4	4	4	3	4	4	4	2	24	16	75	20	11.3846	34.6154	12	15.6364	75	33	12.32	78.125
2	2	1	2	2	2	2	1	2	1	1	2	2	2	1	2	2	2	3	2	3	2	2	2	2	2	4	17	6.66667	16.6667	14	4	11.5385	7	8.36364	33.3333	17	2.08	28.125
4	4	4	4	4	4	4	4	4	4	4	5	4	5	4	4	4	5	4	4	3	4	4	4	4	4	2	25	17.3333	83.3333	22	13.8462	42.3077	11	14.1818	66.6667	38	15.52	93.75
4	4	4	4	4	4	4	3	4	4	4	4	4	4	4	4	4	3	4	4	4	4	3	4	3	4	2	23	14.6667	66.6667	22	13.8462	42.3077	12	15.6364	75	33	12.32	78.125
5	5	5	5	5	5	5	5	5	5	5	5	5	5	5	5	5	5	5	5	4	5	5	5	5	5	1	27	20	100	26	18.7692	57.6923	14	18.5455	91.6667	45	20	115.625
3	3	3	3	3	3	3	2	3	2	3	3	3	3	2	3	3	2	3	3	3	3	3	3	3	3	3	18	8	25	18	8.92308	26.9231	9	11.2727	50	26	7.84	56.25
5	5	5	4	5	5	5	5	5	5	5	5	4	5	5	5	5	5	5	5	5	4	5	5	5	5	1	28	21.3333	108.333	26	18.7692	57.6923	14	18.5455	91.6667	43	18.72	109.375
4	4	4	4	3	4	4	4	4	4	4	4	4	4	4	4	3	3	4	4	4	4	4	4	4	4	2	22	13.3333	58.3333	21	12.6154	38.4615	12	15.6364	75	36	14.24	87.5
5	5	5	4	5	5	5	5	5	5	4	5	5	5	5	5	4	5	5	5	5	5	5	5	5	5	1	27	20	100	25	17.5385	53.8462	15	20	100	45	20	115.625
5	5	5	5	5	5	5	5	5	5	5	5	5	5	5	5	5	5	5	5	5	4	5	5	5	5	1	27	20	100	26	18.7692	57.6923	14	18.5455	91.6667	45	20	115.625
2	2	2	2	2	2	2	2	3	2	1	2	3	2	2	2	2	2	3	2	3	2	2	3	2	2	4	18	8	25	14	4	11.5385	7	8.36364	33.3333	22	5.28	43.75
5	5	5	5	5	4	5	4	5	5	5	5	5	5	4	5	5	5	5	4	5	5	5	5	5	5	1	26	18.6667	91.6667	25	17.5385	53.8462	14	18.5455	91.6667	44	19.36	112.5
5	5	5	5	5	5	5	5	5	5	5	5	5	5	5	4	5	5	4	5	5	5	5	5	5	5	1	26	18.6667	91.6667	25	17.5385	53.8462	15	20	100	45	20	115.625
3	3	3	3	3	3	3	3	3	3	3	3	3	3	2	3	3	3	3	3	3	3	3	3	2	3	3	20	10.6667	41.6667	18	8.92308	26.9231	9	11.2727	50	26	7.84	56.25
3	3	3	3	3	3	3	3	3	3	3	3	3	2	3	3	3	3	3	3	3	3	3	3	3	3	3	21	12	50	18	8.92308	26.9231	9	11.2727	50	26	7.84	56.25
5	5	5	5	5	5	5	4	5	5	5	5	5	5	5	5	5	5	5	5	5	5	5	4	5	5	1	27	20	100	26	18.7692	57.6923	15	20	100	43	18.72	109.375
4	3	5	3	4	4	4	5	4	3	4	4	3	4	3	4	3	3	3	3	4	5	5	4	4	4	4	20	10.6667	41.6667	21	12.6154	38.4615	12	15.6364	75	36	14.24	87.5
4	4	4	4	4	4	4	4	4	3	4	4	4	4	4	4	4	4	4	4	4	4	4	4	4	4	2	23	14.6667	66.6667	22	13.8462	42.3077	12	15.6364	75	36	14.24	87.5
4	4	4	4	3	4	4	4	4	4	4	4	3	4	4	4	4	4	4	4	3	4	4	4	4	4	2	24	16	75	21	12.6154	38.4615	11	14.1818	66.6667	34	12.96	81.25
2	2	2	2	2	2	2	2	3	2	1	2	3	2	2	2	2	2	3	2	3	2	2	2	2	2	4	18	8	25	14	4	11.5385	7	8.36364	33.3333	21	4.64	40.625
5	5	5	5	5	5	5	5	5	5	5	5	5	5	5	5	4	5	5	5	5	5	5	5	5	5	1	26	18.6667	91.6667	26	18.7692	57.6923	15	20	100	45	20	115.625
3	3	3	3	2	3	3	3	3	3	3	2	3	2	3	3	3	3	3	3	3	3	3	3	3	3	3	21	12	50	17	7.69231	23.0769	9	11.2727	50	25	7.2	53.125
3	3	3	3	3	3	3	3	3	3	3	3	3	3	3	3	3	3	3	3	3	3	3	3	3	3	3	21	12	50	18	8.92308	26.9231	9	11.2727	50	27	8.48	59.375
5	5	5	5	5	4	5	5	4	5	5	5	5	5	4	5	5	5	5	5	4	5	5	5	5	5	1	26	18.6667	91.6667	25	17.5385	53.8462	14	18.5455	91.6667	44	19.36	112.5
5	5	5	5	5	5	5	5	5	5	5	5	5	5	5	4	5	5	5	5	5	4	5	5	5	5	1	26	18.6667	91.6667	26	18.7692	57.6923	14	18.5455	91.6667	45	20	115.625
2	1	2	2	1	2	2	2	1	2	1	1	2	1	2	2	2	2	2	2	3	2	2	3	3	2	4	18	8	25	12	1.53846	3.84615	7	8.36364	33.3333	17	2.08	28.125
3	3	3	3	3	3	3	3	3	3	3	3	3	3	3	2	3	2	3	3	3	3	3	3	3	3	3	19	9.33333	33.3333	18	8.92308	26.9231	9	11.2727	50	27	8.48	59.375
3	3	3	3	3	3	3	3	3	2	3	3	3	3	2	3	3	3	3	2	3	3	3	3	3	3	3	19	9.33333	33.3333	18	8.92308	26.9231	8	9.81818	41.6667	27	8.48	59.375
3	3	3	3	3	3	3	3	3	2	3	3	3	3	3	3	3	3	2	3	3	4	3	3	3	3	3	20	10.6667	41.6667	17	7.69231	23.0769	10	12.7273	58.3333	27	8.48	59.375
5	5	5	5	5	4	5	5	5	5	5	5	5	5	5	5	5	5	5	4	5	5	5	5	5	5	1	27	20	100	25	17.5385	53.8462	14	18.5455	91.6667	45	20	115.625
5	5	4	5	5	4	4	4	4	5	4	4	5	4	4	4	4	4	4	4	5	4	4	4	4	4	2	24	16	75	23	15.0769	46.1538	13	17.0909	83.3333	38	15.52	93.75
5	5	4	5	5	4	4	4	5	4	4	4	4	4	4	4	4	4	4	4	4	4	5	4	4	4	2	23	14.6667	66.6667	23	15.0769	46.1538	12	15.6364	75	38	15.52	93.75
3	3	3	4	3	4	4	4	4	4	3	4	4	4	3	4	5	4	4	4	4	4	4	4	4	4	2	25	17.3333	83.3333	20	11.3846	34.6154	12	15.6364	75	36	14.24	87.5
5	5	5	5	5	5	5	5	5	5	5	4	5	4	5	5	5	5	5	5	5	5	5	5	5	5	1	27	20	100	26	18.7692	57.6923	15	20	100	43	18.72	109.375
5	5	5	5	5	5	4	5	5	5	5	5	5	4	5	5	5	5	5	5	5	5	5	5	4	5	1	27	20	100	25	17.5385	53.8462	15	20	100	43	18.72	109.375
2	2	2	2	2	3	2	1	3	2	1	2	2	3	2	2	2	2	2	2	3	2	2	2	2	2	4	18	8	25	14	4	11.5385	7	8.36364	33.3333	19	3.36	34.375
5	5	5	5	5	5	5	5	5	4	5	5	5	5	5	5	5	5	5	4	5	5	5	5	5	5	1	26	18.6667	91.6667	26	18.7692	57.6923	14	18.5455	91.6667	45	20	115.625
2	2	2	2	2	2	2	1	2	2	1	2	2	2	2	1	2	2	1	2	3	1	3	2	1	2	4	17	6.66667	16.6667	12	1.53846	3.84615	6	6.90909	25	17	2.08	28.125
5	5	5	5	5	5	5	5	4	5	5	4	5	5	5	5	5	5	5	5	5	5	5	5	4	5	1	27	20	100	26	18.7692	57.6923	15	20	100	42	18.08	106.25
5	5	5	5	5	5	5	5	5	5	5	5	5	5	4	5	5	5	5	5	5	4	5	5	5	5	1	26	18.6667	91.6667	26	18.7692	57.6923	14	18.5455	91.6667	45	20	115.625
4	4	4	4	4	4	3	4	4	4	4	4	4	4	4	4	4	4	4	4	5	4	4	4	4	4	2	24	16	75	21	12.6154	38.4615	13	17.0909	83.3333	36	14.24	87.5
5	5	5	5	5	5	5	5	5	5	5	5	5	5	5	4	5	5	5	5	5	5	5	5	4	5	1	26	18.6667	91.6667	26	18.7692	57.6923	15	20	100	44	19.36	112.5
5	5	5	5	5	5	5	5	5	5	5	5	5	5	5	5	5	5	5	5	4	5	5	5	5	5	1	27	20	100	26	18.7692	57.6923	14	18.5455	91.6667	45	20	115.625
4	4	4	4	5	4	4	4	4	4	4	4	4	4	4	4	4	4	4	4	4	4	5	4	4	4	2	24	16	75	23	15.0769	46.1538	12	15.6364	75	37	14.88	90.625
4	4	3	4	4	4	4	4	4	4	4	4	4	4	4	4	3	4	4	4	3	4	4	4	4	4	2	24	16	75	22	13.8462	42.3077	11	14.1818	66.6667	36	14.24	87.5
4	4	4	4	4	4	4	4	4	4	5	4	4	4	4	4	3	4	4	4	4	5	4	4	4	4	2	23	14.6667	66.6667	23	15.0769	46.1538	13	17.0909	83.3333	36	14.24	87.5
1	1	2	1	1	2	1	2	2	1	2	1	2	1	2	1	2	2	2	2	1	2	2	2	1	2	4	17	6.66667	16.6667	12	1.53846	3.84615	5	5.45455	16.6667	15	0.8	21.875
5	5	5	5	5	5	5	5	4	5	5	5	5	5	5	5	5	5	4	5	3	5	5	5	5	5	1	27	20	100	25	17.5385	53.8462	13	17.0909	83.3333	44	19.36	112.5
4	4	4	4	4	3	4	4	4	4	4	4	3	4	4	4	4	4	4	4	4	4	4	4	4	4	2	24	16	75	21	12.6154	38.4615	12	15.6364	75	34	12.96	81.25
4	4	4	4	4	4	4	4	5	4	4	4	4	4	4	3	4	3	4	4	4	4	4	4	4	4	2	22	13.3333	58.3333	22	13.8462	42.3077	12	15.6364	75	37	14.88	90.625
4	4	4	4	4	3	4	4	4	4	4	4	4	3	4	4	4	4	3	4	4	4	4	4	4	4	2	24	16	75	20	11.3846	34.6154	12	15.6364	75	35	13.6	84.375
5	5	5	5	4	5	5	5	5	5	5	5	5	5	5	5	5	5	5	5	5	5	5	5	5	5	1	27	20	100	25	17.5385	53.8462	15	20	100	45	20	115.625
5	5	5	5	5	4	5	5	4	5	5	5	5	5	5	4	5	5	5	5	4	5	5	4	5	5	1	26	18.6667	91.6667	25	17.5385	53.8462	14	18.5455	91.6667	43	18.72	109.375
5	5	4	5	4	5	5	5	4	5	5	5	5	5	5	5	5	5	5	5	1	5	4	5	4	5	1	28	21.3333	108.333	25	17.5385	53.8462	11	14.1818	66.6667	42	18.08	106.25
5	5	5	5	5	5	4	5	5	5	5	4	5	5	5	4	5	5	5	5	5	5	5	5	5	5	1	26	18.6667	91.6667	25	17.5385	53.8462	15	20	100	44	19.36	112.5
5	5	5	5	5	5	5	4	5	5	4	5	5	5	5	5	5	5	5	4	4	5	5	5	5	5	1	27	20	100	25	17.5385	53.8462	13	17.0909	83.3333	44	19.36	112.5
4	4	4	4	4	4	4	5	4	4	4	5	4	4	4	4	4	4	4	4	4	4	4	4	4	4	2	24	16	75	22	13.8462	42.3077	12	15.6364	75	38	15.52	93.75
4	4	4	4	4	5	4	4	4	4	4	4	4	4	4	3	4	4	4	4	4	4	4	4	4	4	2	23	14.6667	66.6667	23	15.0769	46.1538	12	15.6364	75	36	14.24	87.5
5	5	5	5	5	5	5	5	5	5	5	5	5	5	5	5	5	5	5	5	4	5	5	5	5	5	1	27	20	100	26	18.7692	57.6923	14	18.5455	91.6667	45	20	115.625
4	4	4	4	4	4	3	4	4	3	4	4	4	4	4	4	4	3	4	4	3	4	4	4	4	4	2	22	13.3333	58.3333	21	12.6154	38.4615	11	14.1818	66.6667	36	14.24	87.5
5	5	5	5	5	4	5	5	5	5	4	5	5	5	5	5	4	5	5	4	5	4	5	5	4	5	1	26	18.6667	91.6667	24	16.3077	50	13	17.0909	83.3333	44	19.36	112.5
4	4	4	5	5	4	4	4	4	4	3	4	4	4	4	3	4	4	4	4	4	4	4	4	4	4	2	22	13.3333	58.3333	22	13.8462	42.3077	12	15.6364	75	36	14.24	87.5
5	5	5	4	5	5	5	5	4	5	5	5	5	5	4	5	5	5	5	4	5	5	5	5	5	4	1	27	20	100	27	20	61.5385	14	18.5455	91.6667	44	19.36	112.5
4	4	4	4	4	4	4	4	4	4	4	4	3	4	4	4	4	4	4	4	4	4	4	4	4	4	2	24	16	75	22	13.8462	42.3077	12	15.6364	75	34	12.96	81.25
5	5	4	5	5	5	5	5	5	5	5	4	5	5	5	5	5	5	5	5	3	4	5	5	4	5	1	28	21.3333	108.333	26	18.7692	57.6923	12	15.6364	75	43	18.72	109.375
4	3	4	4	3	4	4	4	4	3	4	4	3	4	4	4	3	4	4	4	4	4	4	4	4	4	2	22	13.3333	58.3333	21	12.6154	38.4615	12	15.6364	75	34	12.96	81.25
2	2	2	2	2	2	2	1	2	1	1	2	2	2	2	2	2	2	2	2	2	2	2	2	2	2	4	17	6.66667	16.6667	13	2.76923	7.69231	6	6.90909	25	17	2.08	28.125
4	4	4	3	4	4	4	4	4	4	4	4	4	5	4	4	4	4	4	4	4	4	4	4	5	4	2	25	17.3333	83.3333	22	13.8462	42.3077	12	15.6364	75	38	15.52	93.75
4	4	4	4	4	4	4	3	4	4	4	4	3	4	4	4	4	4	4	3	4	4	4	4	3	4	2	24	16	75	22	13.8462	42.3077	11	14.1818	66.6667	32	11.68	75
5	5	5	5	5	5	5	5	5	5	5	5	5	5	5	5	5	5	5	5	4	5	5	5	5	4	1	27	20	100	27	20	61.5385	14	18.5455	91.6667	45	20	115.625
2	2	3	1	3	2	3	3	3	2	1	3	3	3	2	3	2	2	3	3	3	2	3	3	3	2	3	19	9.33333	33.3333	16	6.46154	19.2308	8	9.81818	41.6667	27	8.48	59.375
5	5	5	5	5	5	5	5	4	5	5	5	5	4	5	5	5	5	5	5	4	4	5	5	5	5	1	27	20	100	26	18.7692	57.6923	13	17.0909	83.3333	43	18.72	109.375
4	4	4	4	4	5	4	4	4	4	4	4	4	3	4	4	4	4	4	4	4	4	4	4	4	4	2	24	16	75	23	15.0769	46.1538	12	15.6364	75	35	13.6	84.375
5	5	5	4	5	5	5	5	5	5	4	5	5	5	4	5	5	5	5	5	5	5	5	5	5	5	1	27	20	100	25	17.5385	53.8462	15	20	100	45	20	115.625
5	5	4	5	5	4	5	5	5	5	5	4	5	5	5	5	5	4	5	5	3	5	5	5	5	5	1	27	20	100	25	17.5385	53.8462	13	17.0909	83.3333	44	19.36	112.5
2	2	2	2	2	2	2	2	3	2	1	2	2	2	3	2	2	2	2	2	2	2	2	2	2	2	4	19	9.33333	33.3333	13	2.76923	7.69231	6	6.90909	25	19	3.36	34.375
5	5	5	5	5	4	5	4	5	5	5	5	5	5	4	5	5	5	5	4	4	5	5	5	5	5	1	26	18.6667	91.6667	25	17.5385	53.8462	13	17.0909	83.3333	44	19.36	112.5
5	5	4	5	5	5	4	5	5	5	5	4	5	5	5	4	5	5	4	5	5	5	5	5	4	5	1	27	20	100	24	16.3077	50	15	20	100	43	18.72	109.375
3	3	2	3	3	3	3	3	3	3	3	3	3	3	3	3	3	2	3	3	2	3	2	3	2	3	3	21	12	50	18	8.92308	26.9231	8	9.81818	41.6667	25	7.2	53.125
3	3	3	3	3	3	3	3	3	3	3	3	3	2	3	3	3	3	3	4	3	3	3	3	3	3	3	21	12	50	18	8.92308	26.9231	10	12.7273	58.3333	26	7.84	56.25
3	3	3	3	3	3	3	3	3	3	3	3	4	3	3	3	3	3	3	3	3	3	3	3	3	3	3	21	12	50	18	8.92308	26.9231	9	11.2727	50	29	9.76	65.625
					Legend:	Legend:

## Sheet:  nformation from the computer i
information from the computer in the Medis database
Reason for surgery—exactly what change	Location of the cancerous lesion
5	9
5	1
5	10
5	11
5	7
5	17
10	11
5	12
10	15
6	10
6	13
8	16
6	7
5	9
10	15
5	1
6	7
6	9
10	15
6	6
5	1
6	8
5	1
6	15
6	7
11	1
5	7
10	15
8	16
6	8
6	8
11	6
6	10
5	2
12	2
6	1
13	2
6	10
5	1
8	6
8	13
6	7
5	1
9	1
6	4
10	15
5	2
11	6
7	3
11	7
5	5
7	2
5	6
5	2
6	8
5	6
6	8
6	8
5	7
6	1
5	6
6	8
8	7
5	1
5	2
5	9
5	1
5	10
5	11
5	7
5	17
10	11
5	12
10	15
6	10
6	13
8	16
6	7
5	9
10	15
5	1
6	7
6	9
10	15
6	6
5	1
6	8
5	1
6	15
6	7
11	1
5	7
5	9

## Sheet: MSPSS         
question number
1	2	3	4	5	6	7	8	9	10	11	12
5	5	4	6	5	5	5	5	6	5	5	4
5	5	4	6	5	5	5	5	4	5	5	4
5	5	4	4	5	5	5	4	4	5	5	6
7	7	7	5	7	7	6	6	6	7	7	6
7	7	7	7	7	7	7	7	7	7	7	7
5	5	4	6	5	4	5	5	4	4	5	4
5	5	4	6	5	5	5	5	4	5	5	4
5	5	4	4	5	5	5	5	4	5	5	4
7	7	7	7	7	6	6	7	6	7	7	6
5	5	4	6	5	5	5	5	4	5	5	4
7	7	7	7	7	7	7	7	7	7	7	7
5	5	4	5	5	5	5	5	4	5	5	4
7	7	7	7	7	7	7	7	7	7	7	7
7	7	7	7	7	7	7	7	7	7	7	7
7	7	7	7	7	7	7	7	7	7	7	7
7	7	7	7	7	7	7	7	7	7	7	7
4	5	4	3	5	5	5	5	4	5	5	4
7	7	7	7	7	7	7	7	7	7	7	7
5	5	4	2	5	5	5	5	4	5	5	4
7	7	7	7	7	7	7	7	7	7	7	7
5	5	4	3	5	5	5	5	4	5	5	4
5	5	4	2	5	5	5	3	4	5	5	4
7	7	7	7	7	7	7	7	7	7	7	7
5	5	4	2	5	5	5	5	4	5	3	4
3	5	3	6	5	5	5	3	4	5	5	4
7	7	7	7	7	7	7	7	7	7	7	7
7	7	7	7	7	7	7	7	7	7	7	7
3	5	4	2	5	5	5	5	4	5	5	4
7	7	7	7	7	7	7	7	7	7	7	7
7	7	7	7	7	7	7	7	7	7	7	7
7	7	7	7	7	7	7	7	7	7	7	7
7	7	7	7	7	7	7	7	7	7	7	7
5	5	4	3	5	5	5	5	4	5	3	4
7	7	7	7	7	7	7	7	7	7	7	7
7	7	7	7	7	7	7	7	7	7	7	7
5	3	4	6	5	5	5	3	4	5	5	4
3	5	4	6	5	5	3	5	4	5	5	4
7	7	7	7	7	7	7	7	7	7	7	7
7	7	7	7	7	7	7	7	7	7	7	7
7	7	7	7	7	7	7	7	7	7	7	7
7	7	7	7	7	7	7	7	7	7	7	7
3	5	4	6	5	5	3	5	4	3	5	4
7	7	7	7	7	7	7	7	7	7	7	7
7	7	7	7	7	7	7	7	7	7	7	7
7	7	7	7	7	7	7	7	7	7	7	7
3	5	4	6	5	5	3	5	4	5	5	3
3	5	4	3	5	5	3	5	4	5	5	4
7	7	7	7	7	7	7	7	7	7	7	7
3	5	4	6	5	3	3	3	4	5	5	4
7	7	7	7	7	7	7	7	7	7	7	7
3	5	4	3	5	5	3	5	4	3	5	4
3	5	4	2	5	5	3	5	4	5	5	4
7	7	7	7	7	7	7	7	7	7	7	7
3	5	4	2	5	5	3	5	4	5	5	4
3	5	4	6	5	5	3	4	4	5	5	4
3	5	4	6	5	5	3	5	4	4	5	4
7	7	7	7	7	7	7	7	7	7	7	7
7	7	7	7	7	7	7	7	7	7	7	7
7	7	7	7	7	7	7	7	7	7	7	7
3	3	4	6	5	5	3	5	4	5	5	4
7	7	7	7	7	7	7	7	7	7	7	7
7	7	6	7	7	7	7	7	7	7	7	7
7	7	7	7	7	7	7	7	7	7	7	7
3	3	4	3	5	5	3	5	4	5	5	4
3	5	4	6	3	5	3	5	4	3	5	4
3	5	4	6	5	5	3	3	4	5	5	4
3	5	4	3	5	5	3	3	4	5	5	4
3	5	4	2	5	5	3	5	4	3	5	4
7	7	7	5	7	7	6	6	6	7	7	6
7	7	7	7	7	7	7	7	7	7	7	7
3	5	4	4	5	5	3	5	4	5	5	4
7	7	7	7	7	7	7	7	7	7	7	7
3	5	4	2	5	5	3	5	4	5	5	4
7	7	7	7	7	6	6	7	6	7	7	6
7	7	7	7	7	7	7	7	7	7	7	7
7	7	7	7	7	7	7	7	6	7	7	7
7	7	7	7	7	7	7	7	7	7	7	7
3	5	4	3	5	5	3	5	4	5	5	4
7	7	7	7	7	7	7	7	7	7	7	7
3	5	4	3	5	5	3	5	4	5	5	4
7	7	7	7	7	7	7	7	7	7	7	7
7	7	7	7	7	6	5	7	6	7	7	6
7	7	7	7	7	7	7	7	7	7	7	7
7	7	7	7	7	7	7	7	7	7	7	7
3	5	4	4	5	5	3	5	4	4	5	4
7	7	7	7	7	7	7	7	7	7	7	7
3	5	4	6	5	5	3	5	4	4	5	4
7	7	7	7	7	7	7	7	7	7	7	7
3	5	4	6	5	5	3	5	4	3	3	4
3	5	4	4	3	5	3	3	4	5	4	4
7	7	7	7	7	7	7	7	7	7	7	7
7	7	7	7	7	7	7	7	7	7	7	7
7	7	7	7	7	7	7	7	7	7	7	7

## Sheet: AIS 
question number
1	2	3	4	5	6	7	8
5	5	4	5	4	5	5	5
5	5	5	5	5	4	5	5
5	5	5	5	4	5	5	5
4	5	4	5	4	4	3	3
4	4	5	2	4	4	4	3
5	5	5	5	5	5	5	4
4	3	5	4	5	4	4	4
5	4	5	5	4	5	5	5
4	5	4	4	4	5	4	4
5	5	5	5	5	5	5	5
4	4	3	4	4	4	4	4
5	5	5	4	5	5	5	5
4	3	3	4	4	4	3	3
1	1	2	1	1	1	1	2
4	4	3	4	4	4	4	4
4	3	4	4	4	4	4	3
5	5	5	5	5	5	4	5
2	3	4	2	4	2	4	2
5	5	5	5	5	5	5	5
4	4	5	5	5	5	5	5
5	5	5	5	5	5	5	5
5	4	5	5	5	5	5	5
1	2	3	2	3	2	1	2
5	5	5	4	5	5	5	5
5	5	5	5	4	5	4	5
2	3	4	4	2	4	2	4
4	2	4	3	2	4	2	4
4	5	5	5	5	4	5	5
1	2	1	2	1	2	1	2
5	5	4	4	5	5	5	5
4	5	5	5	5	5	5	5
1	1	2	1	2	2	1	1
5	4	5	5	5	5	5	5
5	3	4	4	3	4	5	3
2	3	4	5	4	4	4	4
5	5	4	5	5	5	4	5
5	4	5	5	5	5	5	5
2	3	4	5	4	4	4	4
2	3	2	3	4	2	4	4
4	4	2	3	2	4	2	2
2	1	2	1	2	3	1	3
5	4	5	5	5	4	5	5
2	3	4	2	4	3	3	4
4	4	4	3	5	4	3	3
4	4	5	5	5	5	4	5
5	5	4	4	5	5	5	5
5	4	5	5	5	5	4	5
1	1	2	1	2	1	2	1
5	5	5	5	5	5	5	5
1	1	1	2	1	1	1	1
5	4	5	5	5	5	4	5
5	5	5	5	5	5	4	5
5	4	5	5	5	4	5	5
4	4	5	5	5	5	4	5
5	5	5	5	5	5	5	5
2	3	3	2	4	4	2	4
2	3	3	2	4	4	2	4
4	1	5	5	5	5	5	5
2	1	2	2	1	2	2	1
5	5	5	5	5	5	5	5
2	1	2	4	3	3	2	2
2	2	2	3	3	2	2	3
2	1	3	1	2	3	1	5
5	5	5	5	5	5	5	5
5	4	5	5	5	5	4	5
5	4	5	5	5	5	4	5
4	5	5	5	4	5	5	5
5	5	5	5	5	5	4	5
5	5	5	5	5	5	3	3
4	4	5	2	5	5	5	3
5	5	5	5	5	5	4	5
1	4	5	4	5	5	4	4
5	4	5	5	5	5	5	5
5	5	5	5	5	5	4	5
3	1	5	1	4	5	4	3
4	4	4	4	4	4	4	4
1	1	3	4	3	3	2	2
5	5	5	5	5	4	5	5
1	1	1	1	1	1	1	2
5	5	5	5	5	5	4	5
4	4	4	4	4	4	4	4
2	3	1	3	1	1	1	1
2	2	3	2	5	3	3	5
5	5	5	5	5	5	5	5
4	4	5	5	5	5	5	5
5	4	5	5	5	5	5	5
5	5	5	5	5	5	5	5
5	5	5	5	4	5	4	5
4	5	5	5	5	5	5	5
5	5	5	5	5	5	5	5
2	3	3	2	4	4	2	4
2	4	3	4	2	4	2	2
4	4	3	2	3	2	2	2

## Sheet: I-ADL
question number
1	2	3	4	5	6	7	8	9
3	3	3	3	3	1	3	3	3
3	3	3	3	3	3	3	3	3
3	3	3	3	3	3	3	3	3
2	2	1	2	2	2	2	2	2
2	2	2	2	1	1	2	2	2
3	3	3	3	3	3	3	3	3
2	2	2	2	1	1	2	2	2
2	3	3	3	3	3	3	3	3
2	2	1	2	1	2	2	2	2
3	3	3	3	3	3	3	3	3
2	2	1	2	1	1	2	2	2
3	3	3	3	3	3	3	3	3
2	3	2	2	2	2	1	2	3
2	2	3	1	1	1	2	1	1
2	2	2	2	2	1	2	2	2
2	2	1	2	2	2	2	2	2
3	3	3	3	3	3	3	3	3
3	2	2	3	1	2	3	2	3
3	3	3	3	3	3	3	3	3
3	3	3	3	3	2	3	3	3
3	3	3	3	3	3	3	3	3
3	3	3	3	3	3	3	3	3
2	1	2	1	2	1	2	1	1
3	3	3	3	3	3	3	3	3
3	3	3	3	3	3	3	3	3
2	1	1	2	1	1	2	2	3
2	1	1	1	2	2	3	2	2
3	3	2	3	3	3	3	3	3
2	1	2	2	1	1	2	1	1
3	3	3	3	3	3	3	3	3
3	3	3	3	3	3	3	3	3
2	1	2	1	2	1	2	1	1
3	3	3	3	3	3	3	3	3
1	2	2	2	1	2	3	2	1
2	2	2	1	1	2	3	1	2
3	3	3	3	3	3	3	3	3
3	3	3	3	3	3	3	3	3
1	2	2	2	1	1	2	1	1
2	1	1	1	1	1	1	2	2
2	1	1	1	1	1	2	2	2
2	1	1	1	1	1	1	1	1
3	3	3	3	3	3	3	3	3
2	2	2	2	2	1	2	2	2
2	2	2	2	2	1	2	2	2
2	2	2	2	2	1	2	2	2
3	3	3	3	3	3	3	3	3
3	3	3	3	3	3	3	3	3
1	1	2	1	2	1	1	2	2
3	3	3	3	2	2	3	3	3
2	1	1	1	1	1	1	1	2
3	3	3	3	3	3	3	3	3
3	3	3	3	3	3	3	3	3
2	2	2	2	2	1	2	2	2
3	3	3	3	3	3	3	3	3
3	3	3	3	3	3	3	3	3
2	2	2	2	2	1	2	2	2
3	2	2	1	2	1	1	3	2
2	3	2	2	2	2	2	1	1
2	2	1	2	1	1	2	2	2
3	3	3	3	3	3	3	3	3
2	2	2	2	2	1	2	2	2
2	1	2	2	2	1	2	2	2
3	1	1	2	1	2	2	3	2
3	3	3	3	3	3	3	3	3
3	3	3	3	3	3	3	3	3
3	3	3	3	3	3	3	3	3
3	3	3	3	3	3	3	3	3
3	3	3	3	3	3	3	3	3
3	3	3	3	3	3	3	3	3
3	3	3	3	3	3	3	3	3
3	3	3	3	3	3	3	3	3
2	3	3	3	3	3	3	3	3
2	3	3	3	3	3	3	3	3
2	1	2	2	2	1	2	1	1
3	3	3	3	3	3	3	3	3
3	3	3	3	3	3	3	3	3
3	3	3	2	2	2	3	3	3
3	3	3	3	3	3	3	3	3
3	2	3	1	1	1	3	3	3
2	2	2	2	2	2	2	2	2
2	2	2	2	2	2	2	2	2
2	2	1	1	1	1	2	1	1
3	2	2	3	1	2	3	3	3
2	2	2	1	2	1	2	1	2
3	3	3	3	3	3	3	3	3
3	3	3	3	3	3	3	3	3
3	3	3	3	3	3	3	3	3
3	3	3	3	3	3	3	3	3
3	3	3	3	3	3	3	3	3
3	3	3	3	3	3	3	3	3
2	1	2	1	2	1	2	2	1
2	2	2	2	1	2	1	2	3
2	2	2	2	3	1	3	3	2
